# Supplementary material
Source: publisher site journal article supplement (https://www.dovepress.com/article/254208)
Supplement: Supplementary file 1 [file get_supplementary_file.php]

**Supplementary table 1. Correlations with the WAIS subtest scores in the control group**

|  | Executive control network | | | | Auditory network | |
| --- | --- | --- | --- | --- | --- | --- |
|  | Left supplementary motor cortex | | Left supramarginal gyrus | | Right postcentral gyrus | |
| Variable | rho | p | rho | p | rho | p |
| WAIS-Ⅲ |  |  |  |  |  |  |
| Digit span | −0.239 | 0.285 | 0.110 | 0.625 | 0.118 | 0.600 |
| Vocabulary | 0.202 | 0.367 | −0.328 | 0.137 | −0.552 | 0.008 |
| Arithmetic | −0.198 | 0.376 | 0.039 | 0.864 | 0.049 | 0.830 |
| Picture arrangement | 0.292 | 0.188 | 0.317 | 0.150 | 0.034 | 0.881 |
| Block design | −0.103 | 0.649 | −0.224 | 0.316 | 0.178 | 0.429 |
| Digit symbol | 0.521 | 0.013 | −0.441 | 0.040 | −0.108 | 0.633 |

Notes: The Spearman’s rho correlation analysis was used to examine the relationships.
