# Supplementary material
Source: publisher site journal article supplement (https://www.dovepress.com/article/254208)
Supplement: Supplementary file 2 [file get_supplementary_file.php]

**
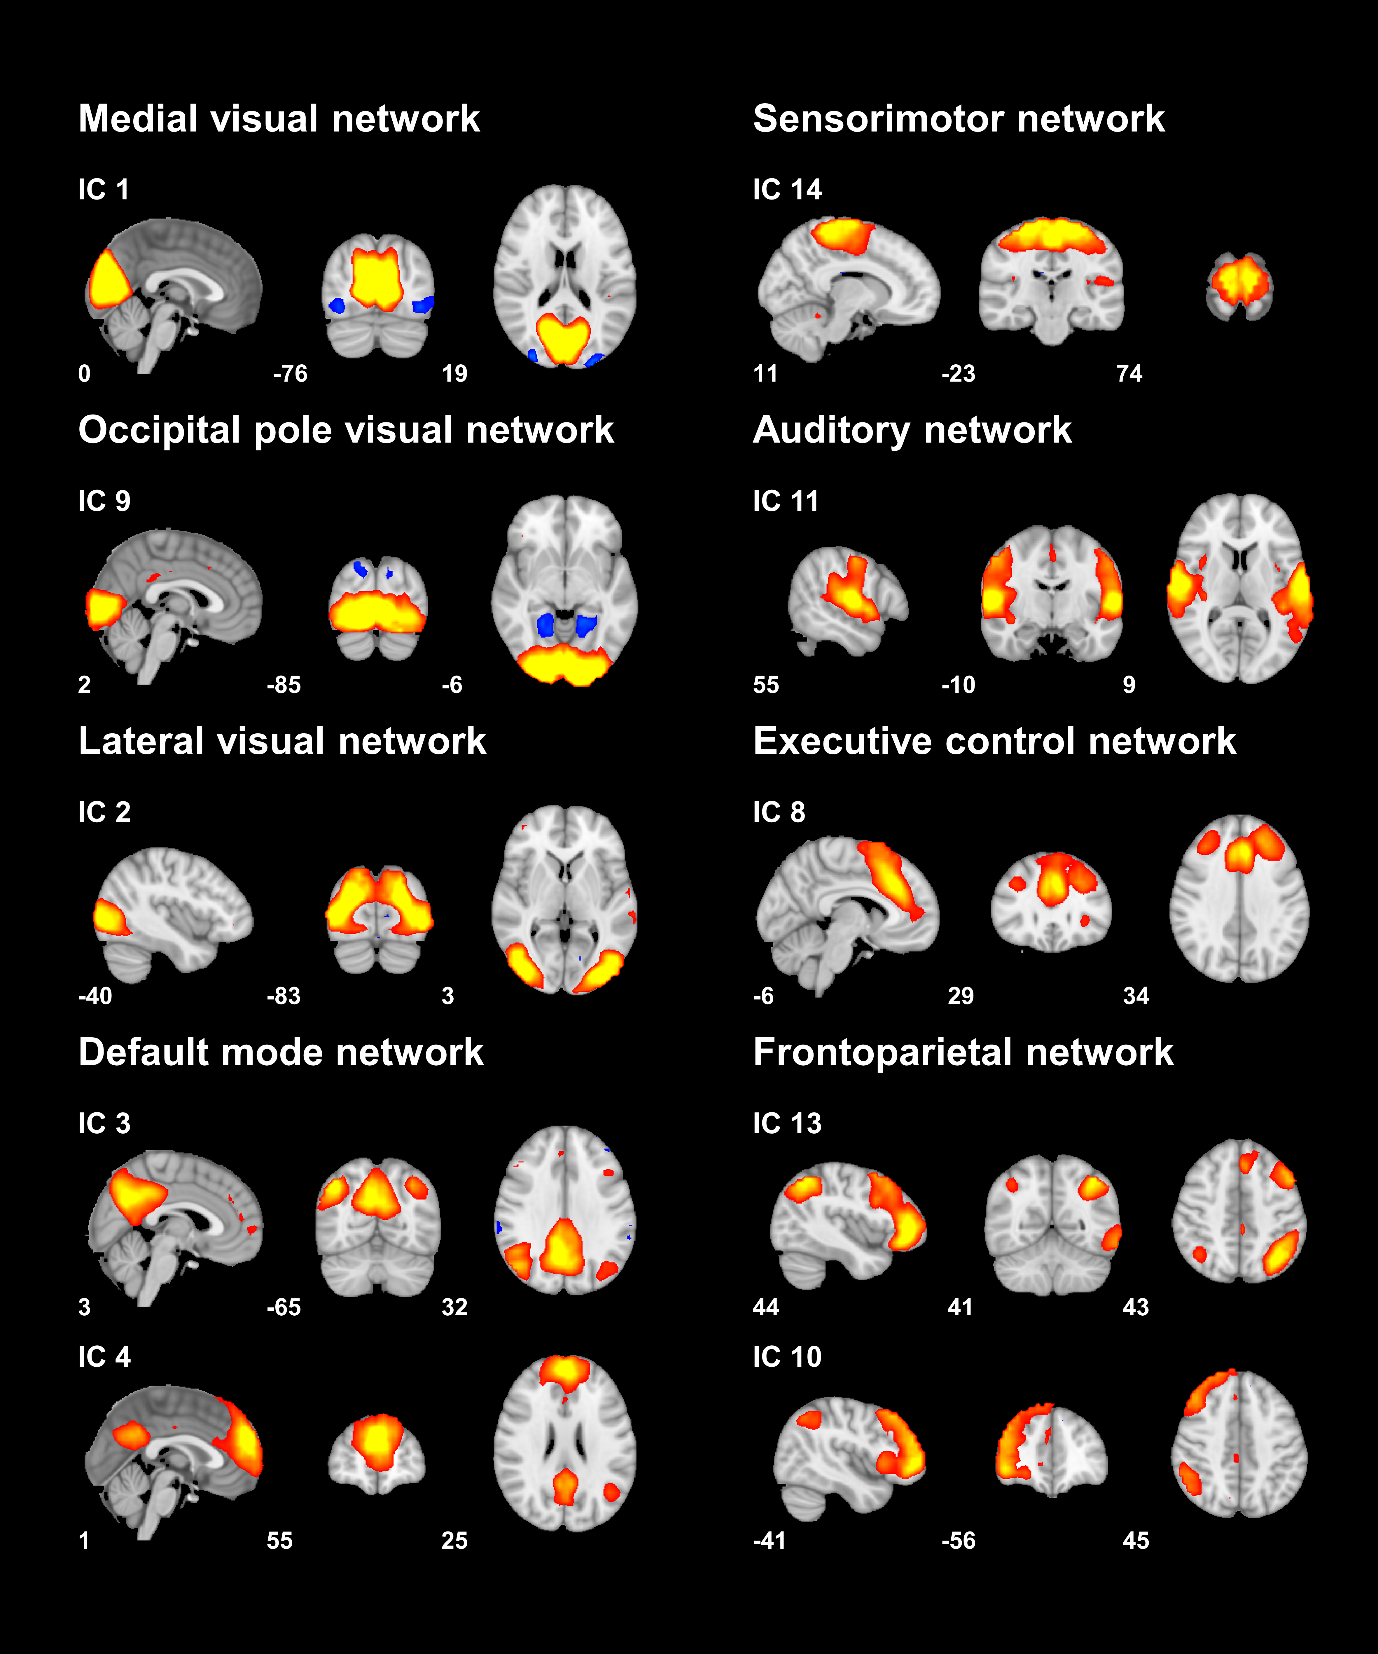
**

**Supplementary Fig. Resting-state networks from the group independent component analysis using both the control and patient groups.** A spatial cross-correlation analysis was carried out using the reference template and with a minimum r of 0.405. The independent components maps overlaid on the Montreal Neurological Institute (MNI) 152 standard space template and are encoded in red-yellow and blue-light blue colors with a 3 < z-score < 8 thresholds.
